# Supplementary material for: A new bulky iminophosphonamide as an N,N′-chelating ligand: synthesis and structural characterization of heteroleptic group 13 element complexes
Source: Royal Society of Chemistry journal article supplement (doi:10.1039/c4dt02637c), 2014-09-15
Supplement: c4dt02637c1.pdf [file c4dt02637c1.pdf]

## Supporting information

### **A new bulky iminophosphonamide as an N,N'-chelating ligand: synthesis and structural characterization of heteroleptic group 13 elements complexes**

**Billa Prashanth<sup>a</sup> and Sanjay Singh<sup>\*a</sup>**

*<sup>a</sup>Department of Chemical Sciences, Indian Institute of Science Education and Research Mohali, Knowledge City, Sector 81, SAS Nagar, Mohali 140306, Punjab, India.*

E-mail: [sanjaysingh@iisermohali.ac.in](mailto:sanjaysingh@iisermohali.ac.in)

**(14 Pages)**

**Contents: 25 Figures:** Fig. S1 to Fig. S25 for multinuclear NMR spectrum of compounds **1-8**.

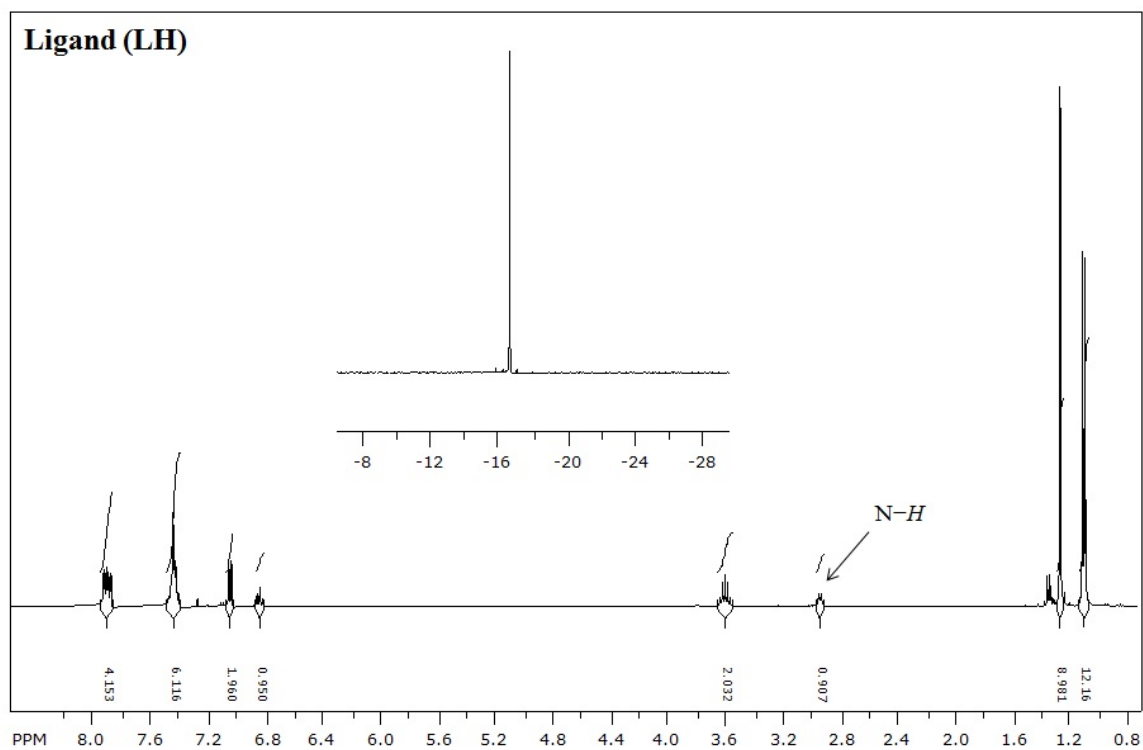

**Fig. S1** Room temperature  $^1\text{H}$  NMR (400 MHz,  $\text{CDCl}_3$ ) spectrum of  $[(2,6\text{-}i\text{Pr}_2\text{C}_6\text{H}_3\text{N})\text{P}(\text{Ph}_2)(\text{N}t\text{Bu})]\text{H}$  (**LH**). The Inset shows the  $^{31}\text{P}\{^1\text{H}\}$  spectrum.

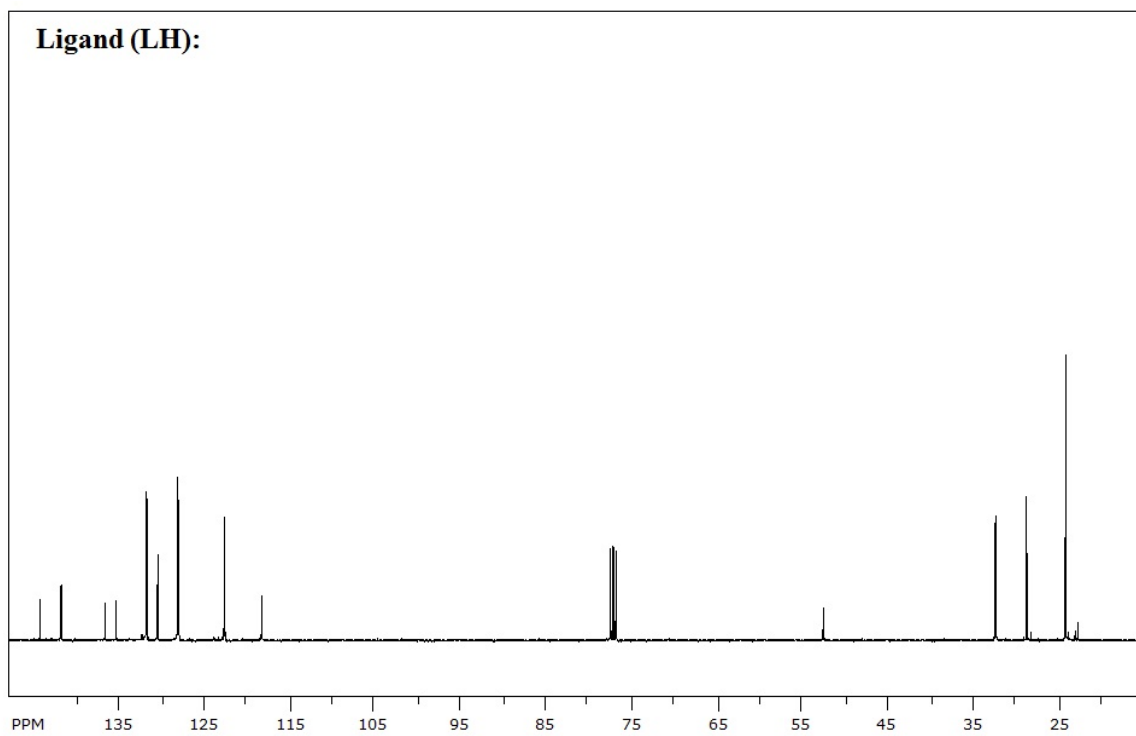

**Fig. S2** Room temperature  $^{13}\text{C}$  NMR (100 MHz,  $\text{CDCl}_3$ ) spectrum of  $[(2,6\text{-}i\text{Pr}_2\text{C}_6\text{H}_3\text{N})\text{P}(\text{Ph}_2)(\text{N}t\text{Bu})]\text{H}$  (**LH**).

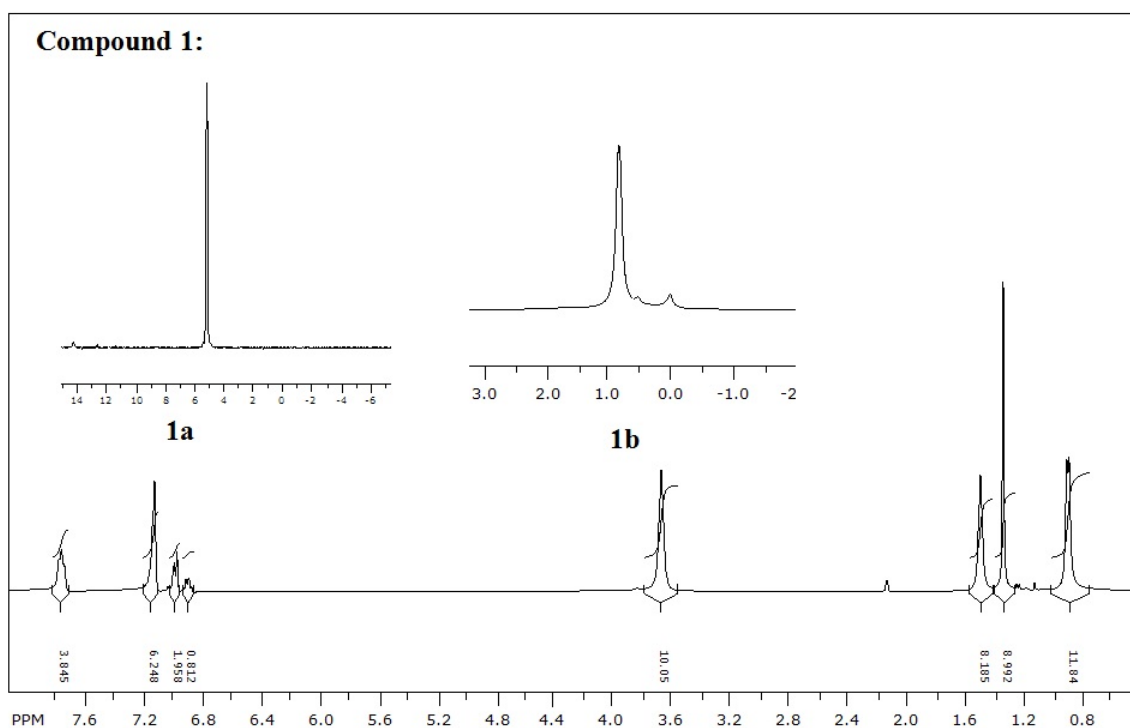

**Fig. S3** Room temperature  $^1\text{H}$  NMR (400 MHz, toluene- $d_8$ ) spectrum of  $[(2,6\text{-}i\text{Pr}_2\text{C}_6\text{H}_3\text{N})\text{P}(\text{Ph}_2)(\text{N}t\text{Bu})](\text{Li}\cdot 2\text{THF})$  (**1**). Inset **1a** shows the  $^{31}\text{P}\{^1\text{H}\}$  NMR (162 MHz, toluene- $d_8$ ,  $-35^\circ\text{C}$ ) spectrum and  $^7\text{Li}$  NMR (155 MHz, toluene- $d_8$ ,  $-35^\circ\text{C}$ ) spectrum is shown in inset **1b**.

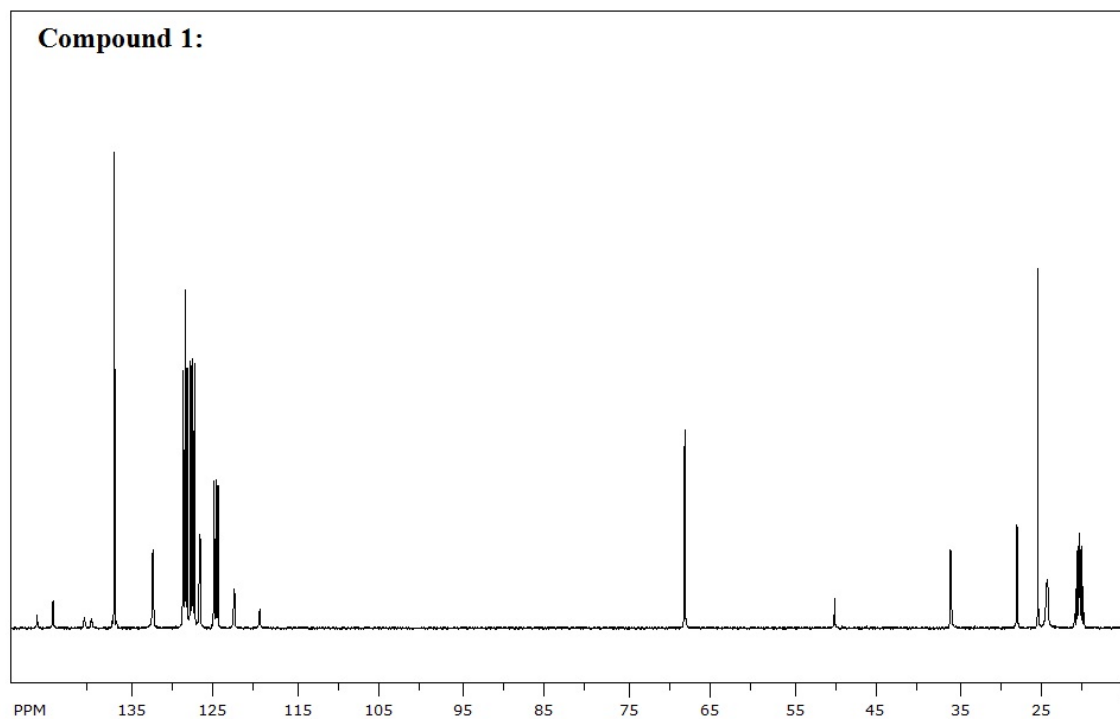

**Fig. S4**  $^{13}\text{C}$  NMR (100 MHz, toluene- $d_8$ ,  $-35^\circ\text{C}$ ) spectrum of  $[(2,6\text{-}i\text{Pr}_2\text{C}_6\text{H}_3\text{N})\text{P}(\text{Ph}_2)(\text{N}t\text{Bu})](\text{Li}\cdot 2\text{THF})$  (**1**).

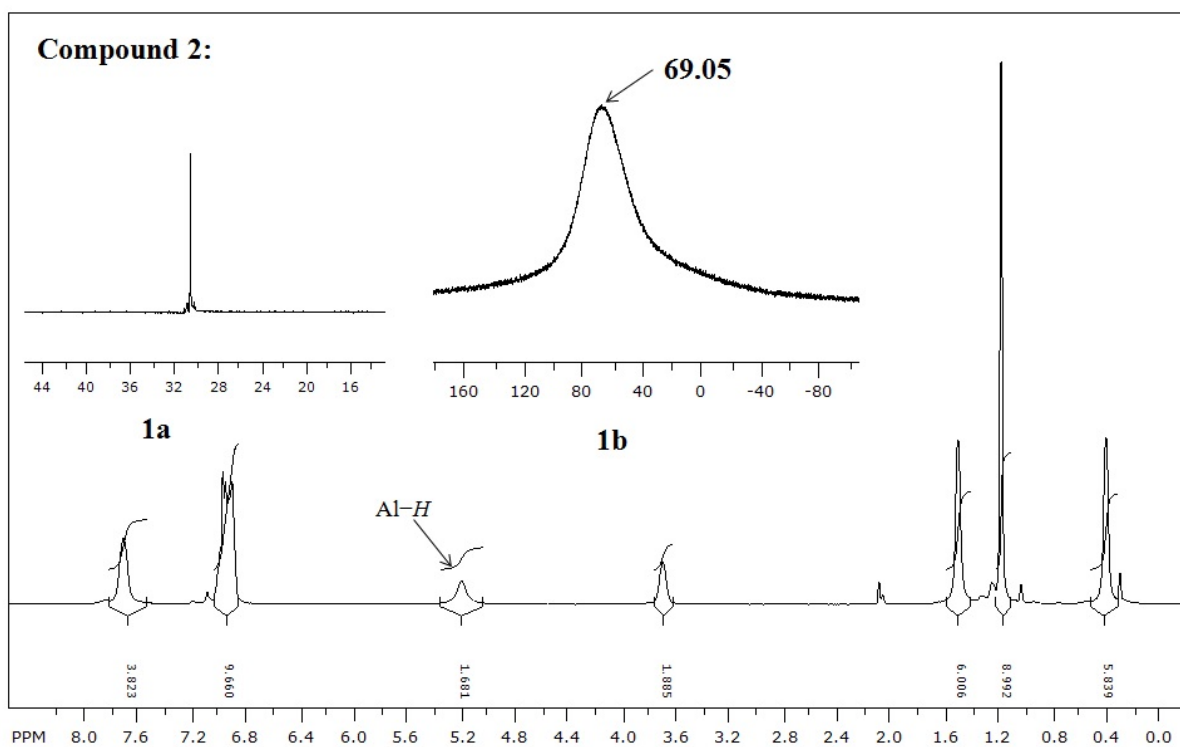

**Fig. S5**  $^1\text{H}$  NMR (400 MHz, toluene- $d_8$ ,  $-35\text{ }^\circ\text{C}$ ) spectrum of  $[\{(2,6\text{-}i\text{Pr}_2\text{C}_6\text{H}_3\text{N})\text{P}(\text{Ph}_2)(\text{N}i\text{Bu})\}\text{AlH}_2]_2$  (**2**). Inset **1a** shows the  $^{31}\text{P}\{^1\text{H}\}$  NMR (162 MHz, toluene- $d_8$ ,  $-35\text{ }^\circ\text{C}$ ) spectrum and  $^{27}\text{Al}$  NMR (104 MHz, toluene- $d_8$ ,  $-35\text{ }^\circ\text{C}$ ) NMR spectrum is shown in inset **1b**.

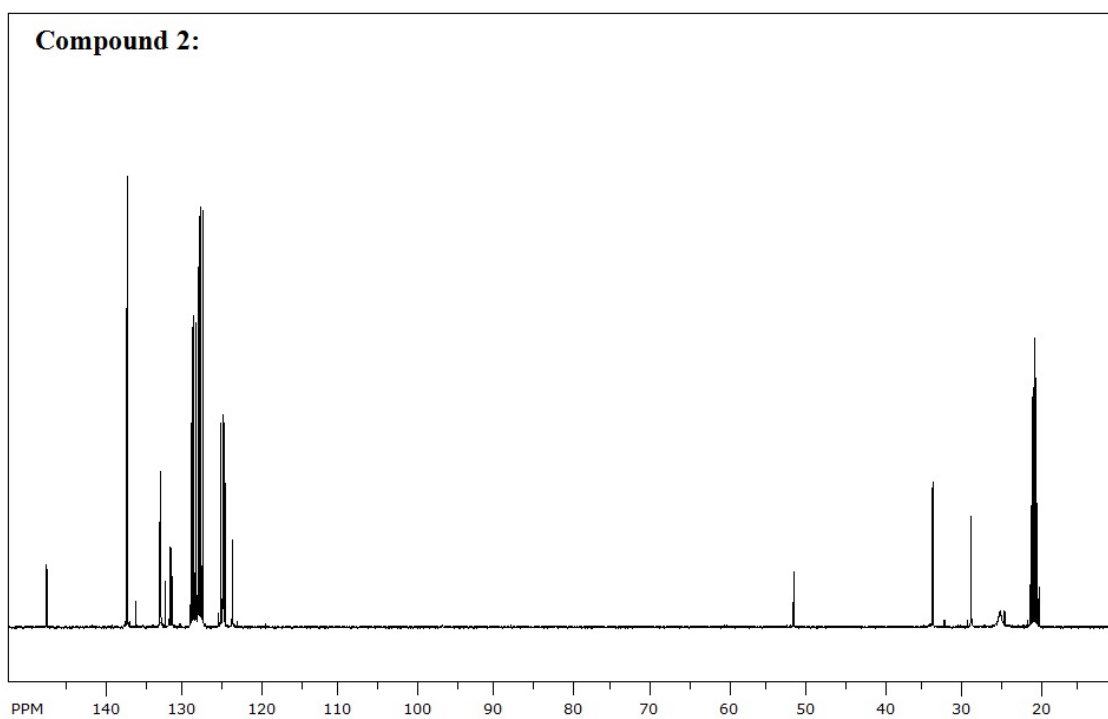

**Fig. S6**  $^{13}\text{C}$  NMR (100 MHz, toluene- $d_8$ ,  $-35\text{ }^\circ\text{C}$ ) spectrum of  $[\{(2,6\text{-}i\text{Pr}_2\text{C}_6\text{H}_3\text{N})\text{P}(\text{Ph}_2)(\text{N}i\text{Bu})\}\text{AlH}_2]_2$  (**2**).

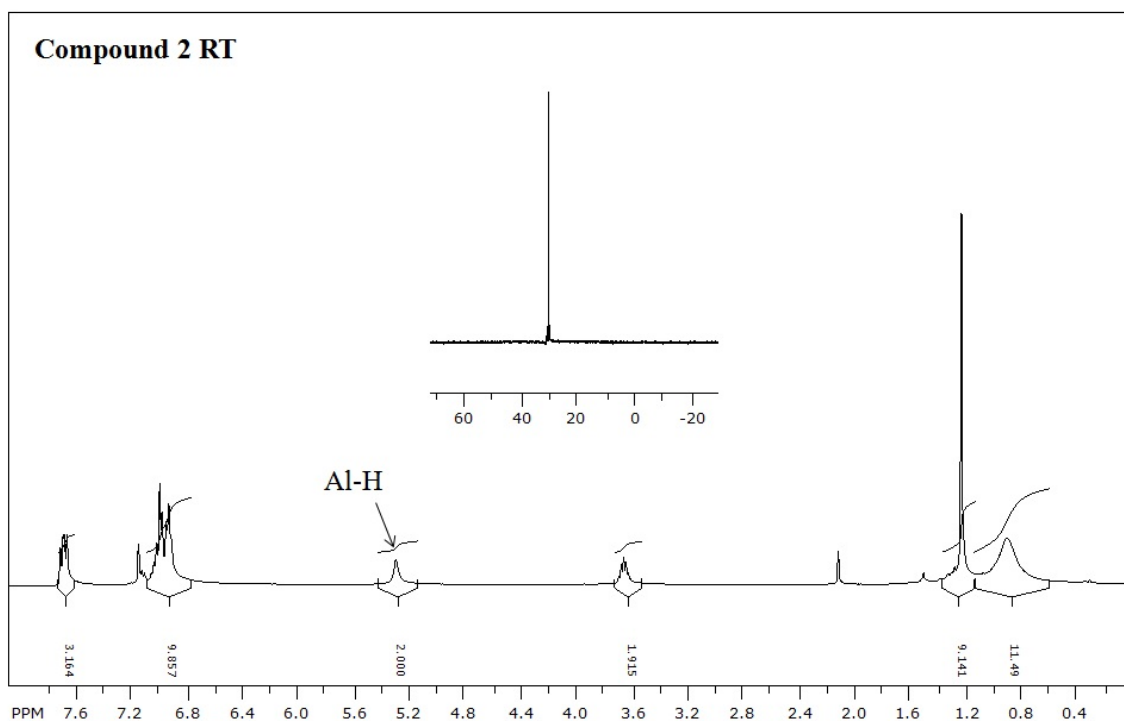

**Fig. S7** Room temperature  $^1\text{H}$  NMR (400 MHz,  $\text{C}_6\text{D}_6$ ) spectrum of  $[\{(2,6\text{-}i\text{Pr}_2\text{C}_6\text{H}_3\text{N})\text{P}(\text{Ph}_2)(\text{N}t\text{Bu})\}\text{AlH}_2]_2$  (**2**). Inset **1a** shows the  $^{31}\text{P}\{^1\text{H}\}$  NMR (162 MHz,  $\text{C}_6\text{D}_6$ ) spectrum and  $^{27}\text{Al}$  NMR (104 MHz,  $\text{C}_6\text{D}_6$ ) NMR spectrum is shown in inset **1b**.

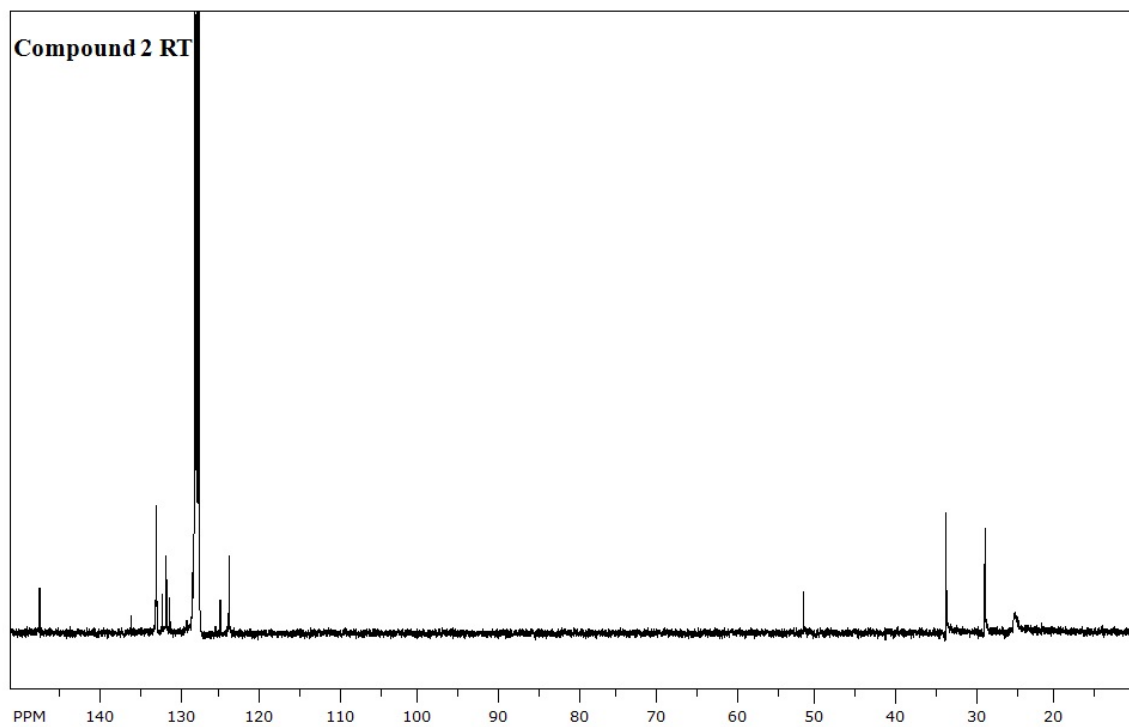

**Fig. S8** Room temperature  $^{13}\text{C}$  NMR (100 MHz,  $\text{C}_6\text{D}_6$ ) spectrum of  $[\{(2,6\text{-}i\text{Pr}_2\text{C}_6\text{H}_3\text{N})\text{P}(\text{Ph}_2)(\text{N}t\text{Bu})\}\text{AlH}_2]_2$  (**2**).

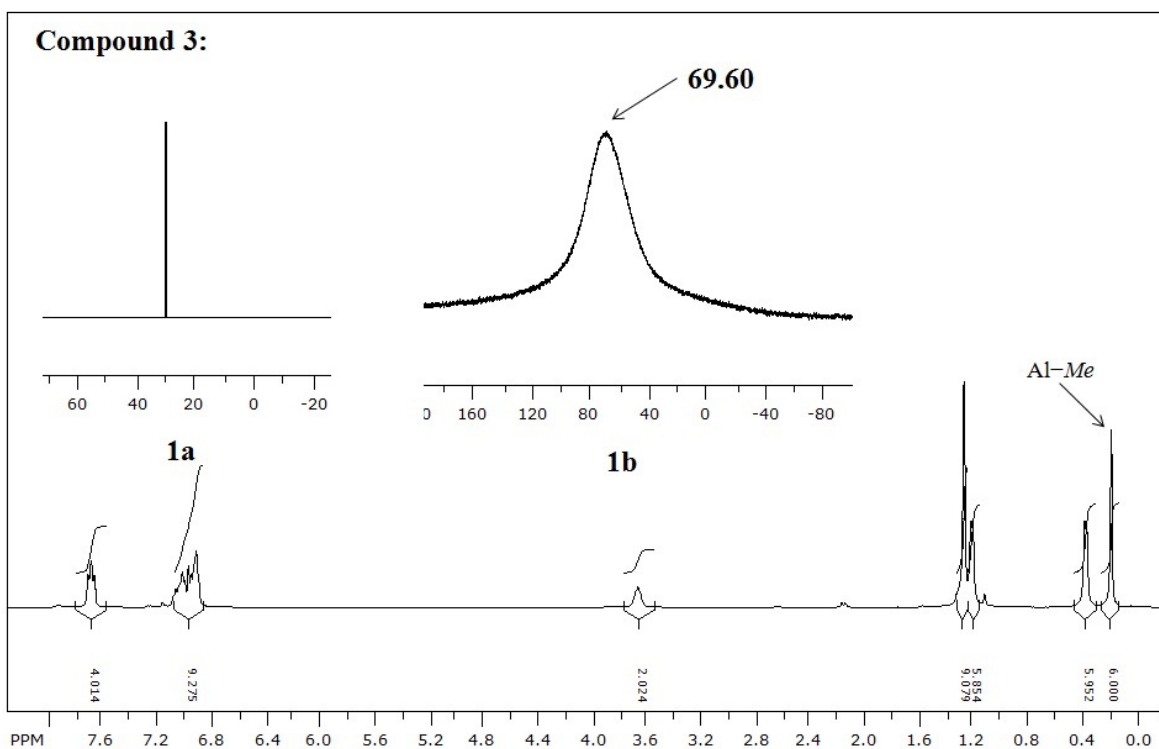

**Fig. S9**  $^1\text{H}$  NMR (400 MHz, toluene- $d_8$ ,  $-35\text{ }^\circ\text{C}$ ) spectrum of  $[(2,6\text{-}i\text{Pr}_2\text{C}_6\text{H}_3\text{N})\text{P}(\text{Ph}_2)(\text{N}i\text{Bu})]\text{AlMe}_2$  (**3**). Inset **1a** shows the  $^{31}\text{P}\{^1\text{H}\}$  (162 MHz, toluene- $d_8$ ,  $-35\text{ }^\circ\text{C}$ ) spectrum and  $^{27}\text{Al}$  NMR (104 MHz, toluene- $d_8$ ,  $-35\text{ }^\circ\text{C}$ ) spectrum is shown in inset **1b**.

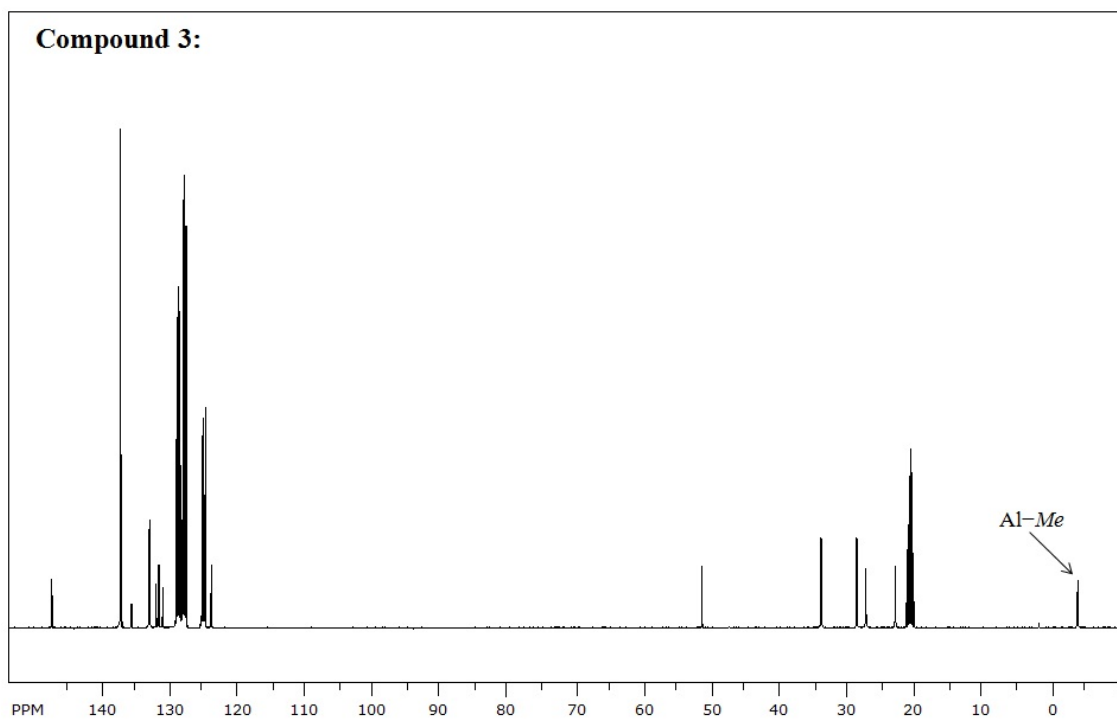

**Fig. S10**  $^{13}\text{C}$  NMR (100 MHz, toluene- $d_8$ ,  $-35\text{ }^\circ\text{C}$ ) spectrum of  $[(2,6\text{-}i\text{Pr}_2\text{C}_6\text{H}_3\text{N})\text{P}(\text{Ph}_2)(\text{N}i\text{Bu})]\text{AlMe}_2$  (**3**).

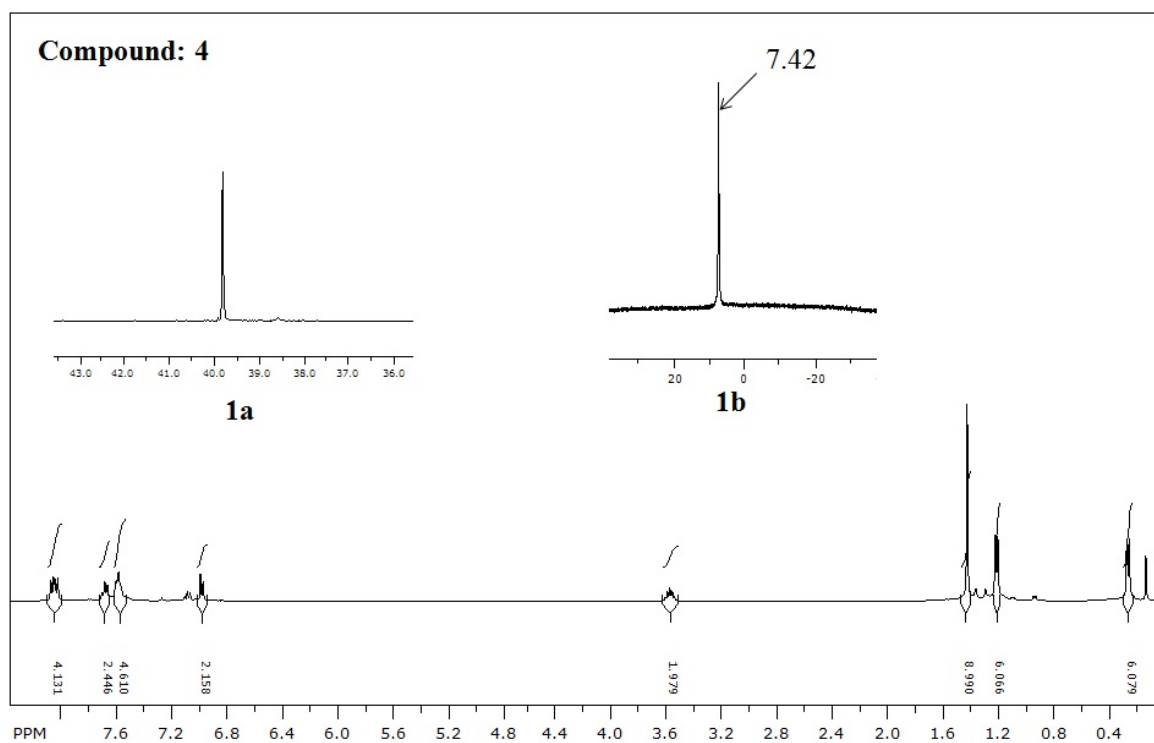

**Fig. S11** Room temperature  $^1\text{H}$  NMR (400 MHz,  $\text{CDCl}_3$ ) spectrum of  $[(2,6\text{-}i\text{Pr}_2\text{C}_6\text{H}_3\text{N})\text{P}(\text{Ph}_2)(\text{N}t\text{Bu})]\text{BCl}_2$  (**4**). Inset **1a** shows the  $^{31}\text{P}\{^1\text{H}\}$  (162 MHz,  $\text{CDCl}_3$ ) spectrum and  $^{11}\text{B}$  NMR (128 MHz,  $\text{CDCl}_3$ ) spectrum is shown in inset **1b**.

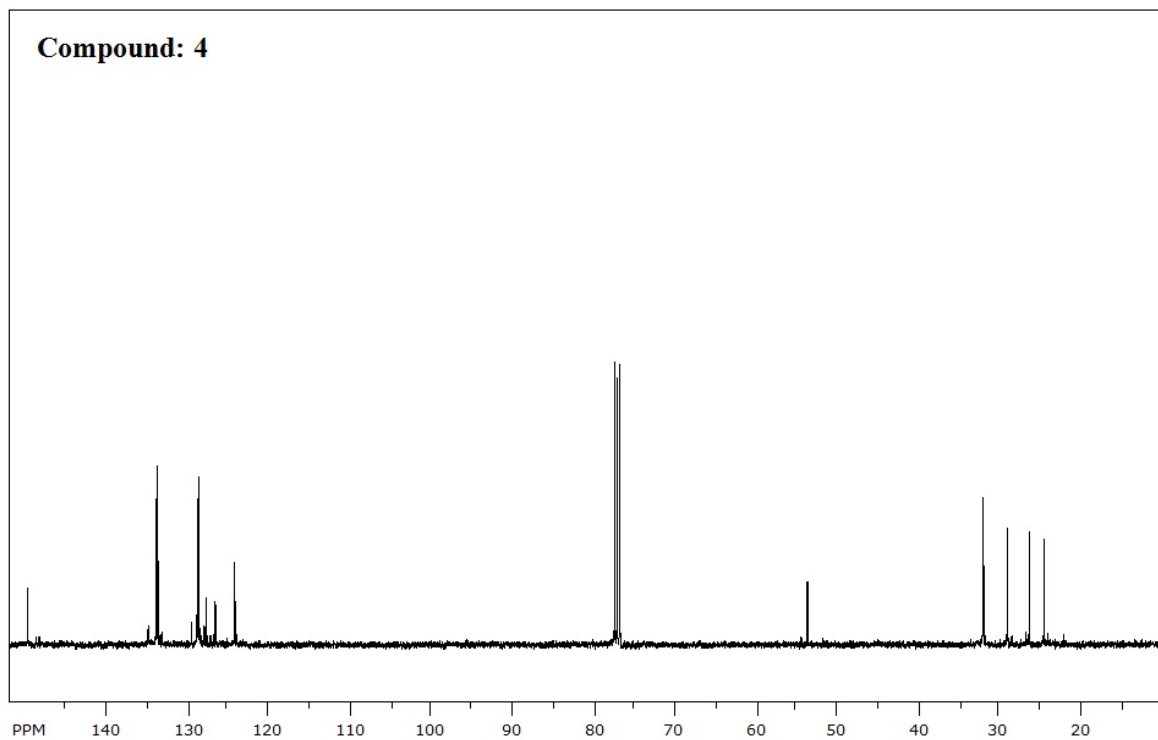

**Fig. S12** Room temperature  $^{13}\text{C}$  NMR (100 MHz,  $\text{CDCl}_3$ ) spectrum of  $[(2,6\text{-}i\text{Pr}_2\text{C}_6\text{H}_3\text{N})\text{P}(\text{Ph}_2)(\text{N}t\text{Bu})]\text{BCl}_2$  (**4**).

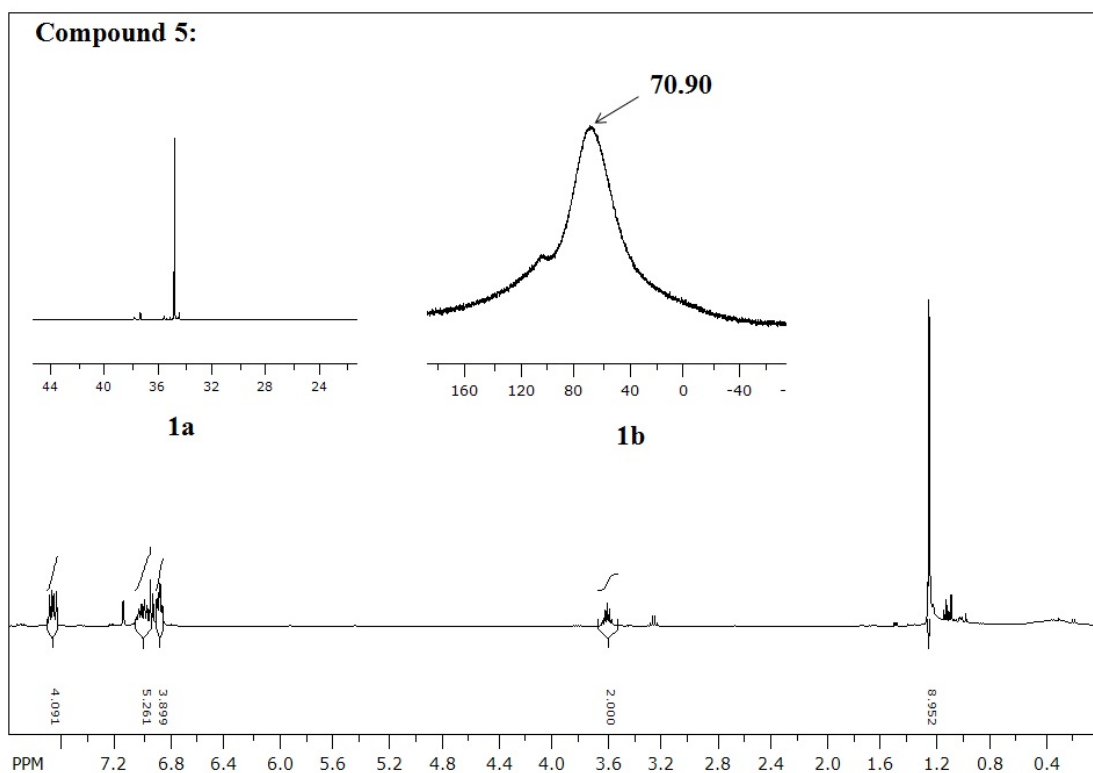

**Fig. S13** Room temperature  $^1\text{H}$  NMR (400 MHz,  $\text{C}_6\text{D}_6$ ) spectrum of  $[(2,6\text{-}i\text{Pr}_2\text{C}_6\text{H}_3\text{N})\text{P}(\text{Ph}_2)(\text{N}t\text{Bu})]\text{AlCl}_2$  (**5**). Inset **1a** shows the  $^{31}\text{P}\{^1\text{H}\}$  (162 MHz,  $\text{C}_6\text{D}_6$ ) spectrum and  $^{27}\text{Al}$  NMR (104 MHz,  $\text{C}_6\text{D}_6$ ) spectrum is shown in inset **1b**.

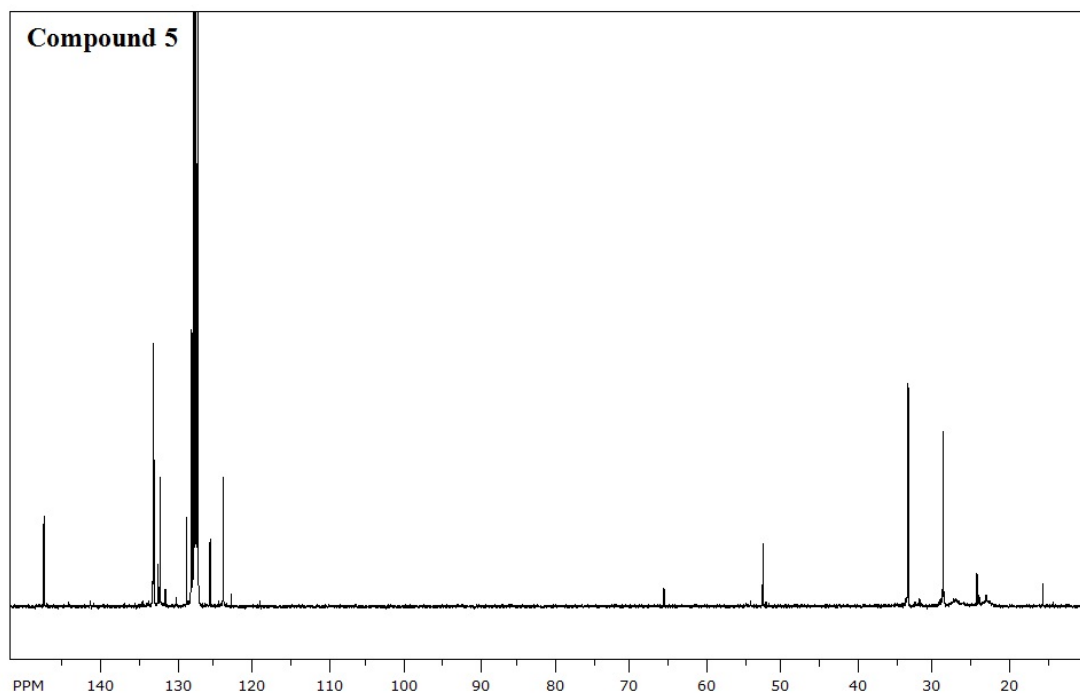

**Fig. S14** Room temperature  $^{13}\text{C}$  NMR (100 MHz,  $\text{C}_6\text{D}_6$ , 25  $^\circ\text{C}$ ) spectrum of  $[(2,6\text{-}i\text{Pr}_2\text{C}_6\text{H}_3\text{N})\text{P}(\text{Ph}_2)(\text{N}t\text{Bu})]\text{AlCl}_2$  (**5**).



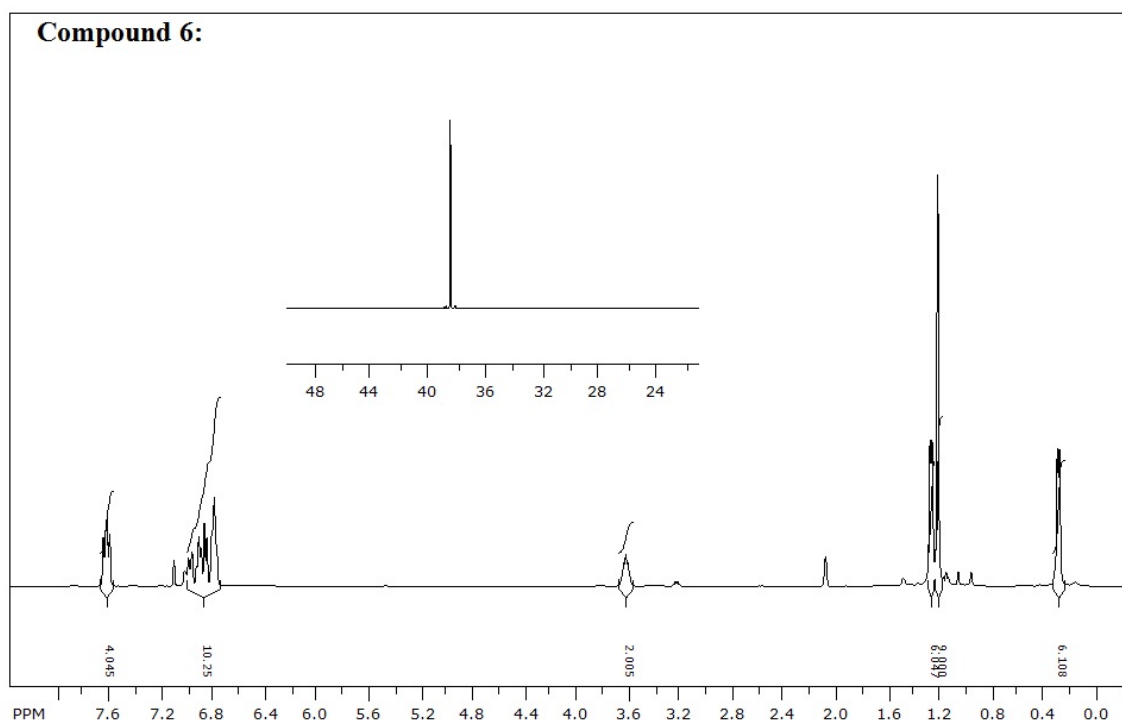

**Fig. S15**  $^1\text{H}$  NMR (400 MHz, toluene- $d_8$ ,  $-35\text{ }^\circ\text{C}$ ) spectrum of  $[(2,6\text{-}i\text{Pr}_2\text{C}_6\text{H}_3\text{N})\text{P}(\text{Ph}_2)(\text{N}t\text{Bu})]\text{GaCl}_2$  (**6**). Inset shows the  $^{31}\text{P}\{^1\text{H}\}$  (162 MHz, toluene- $d_8$ ,  $-35\text{ }^\circ\text{C}$ ) spectrum.

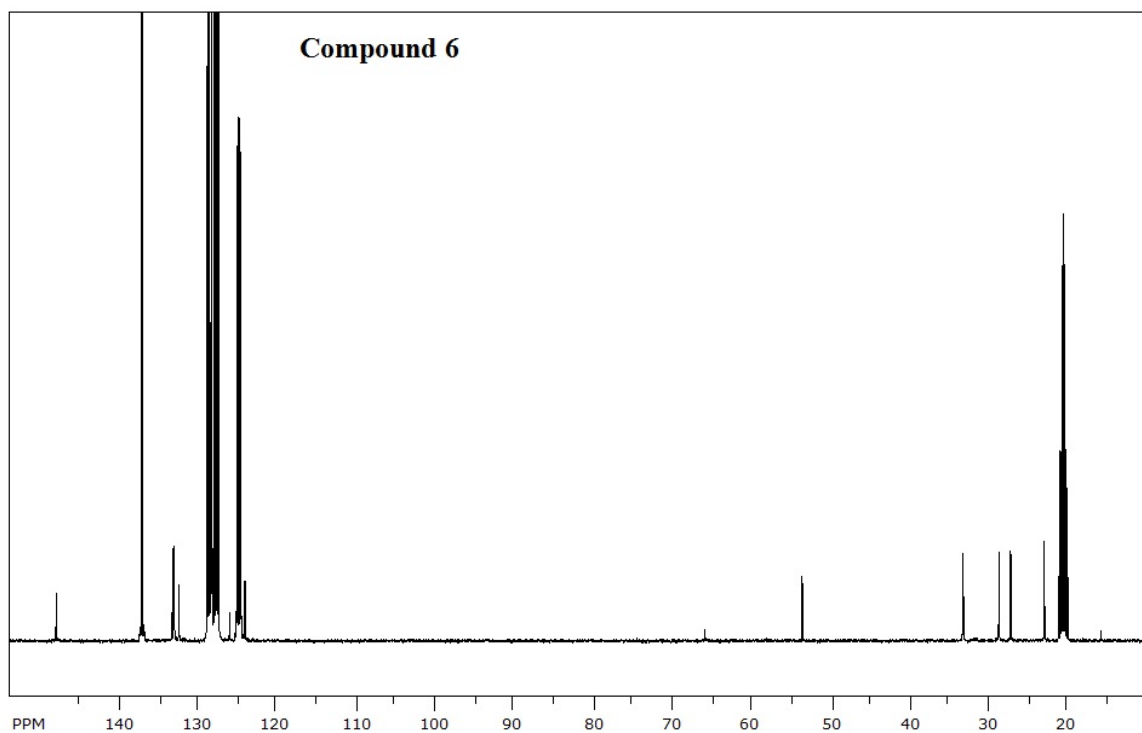

**Fig. S16**  $^{13}\text{C}$  NMR (100 MHz, toluene- $d_8$ ,  $-35\text{ }^\circ\text{C}$ ) spectrum of  $[(2,6\text{-}i\text{Pr}_2\text{C}_6\text{H}_3\text{N})\text{P}(\text{Ph}_2)(\text{N}t\text{Bu})]\text{GaCl}_2$  (**6**).

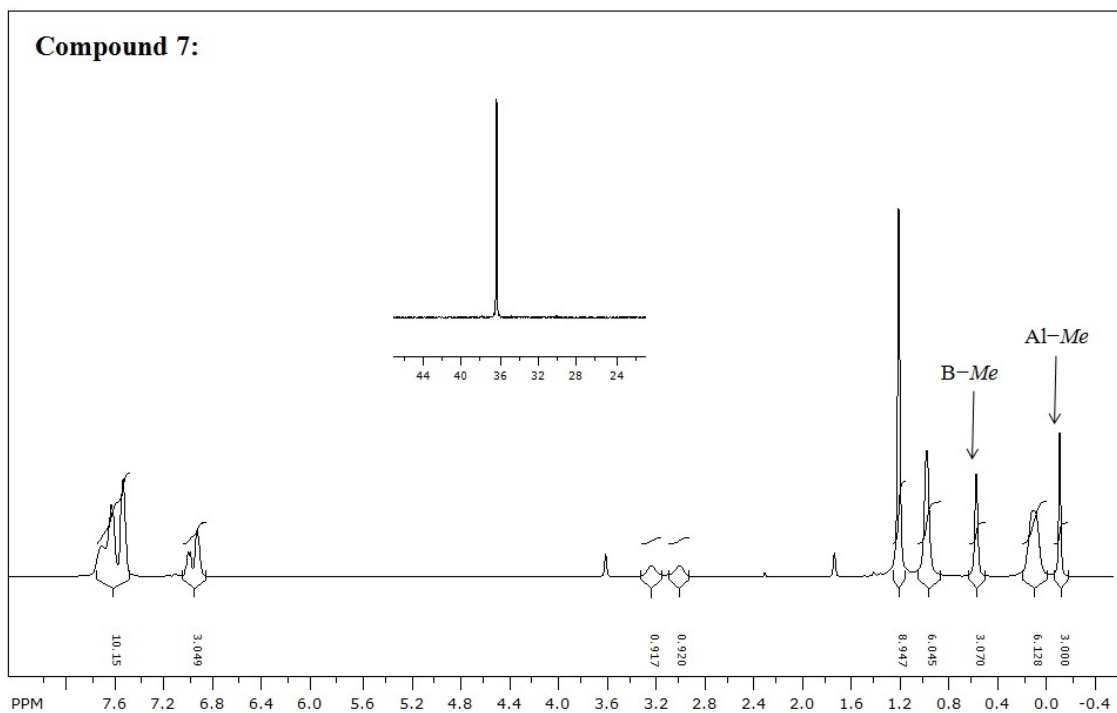

**Fig. S17**  $^1\text{H}$  NMR (400 MHz,  $\text{THF-}d_8$ ,  $-35\text{ }^\circ\text{C}$ ) spectrum of  $[\{(2,6\text{-}i\text{Pr}_2\text{C}_6\text{H}_3\text{N})\text{P}(\text{Ph}_2)(\text{N}t\text{Bu})\}\text{AlMe}]^+ [\text{MeB}(\text{C}_6\text{F}_5)_3]^-$  (**7**). Inset shows the  $^{31}\text{P}\{^1\text{H}\}$  (162 MHz,  $\text{THF-}d_8$ ,  $-35\text{ }^\circ\text{C}$ ) spectrum.

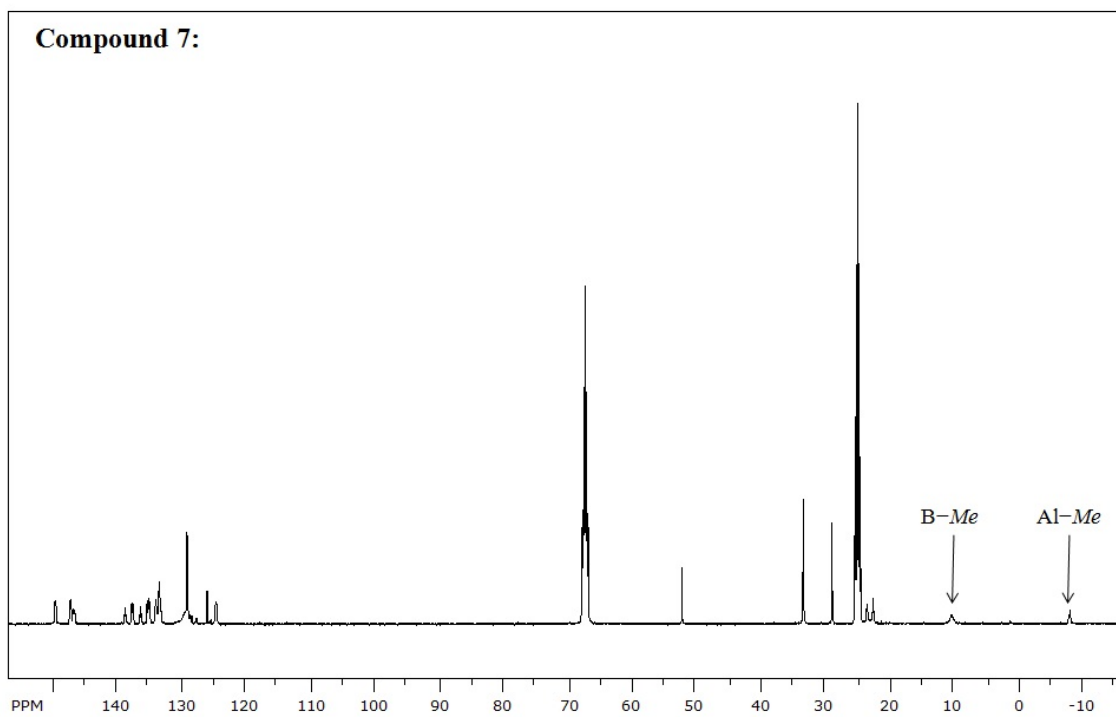

**Fig. S18**  $^{13}\text{C}$  NMR (100 MHz,  $\text{THF-}d_8$ ,  $-35\text{ }^\circ\text{C}$ ) spectrum of  $[\{(2,6\text{-}i\text{Pr}_2\text{C}_6\text{H}_3\text{N})\text{P}(\text{Ph}_2)(\text{N}t\text{Bu})\}\text{AlMe}]^+ [\text{MeB}(\text{C}_6\text{F}_5)_3]^-$  (**7**).

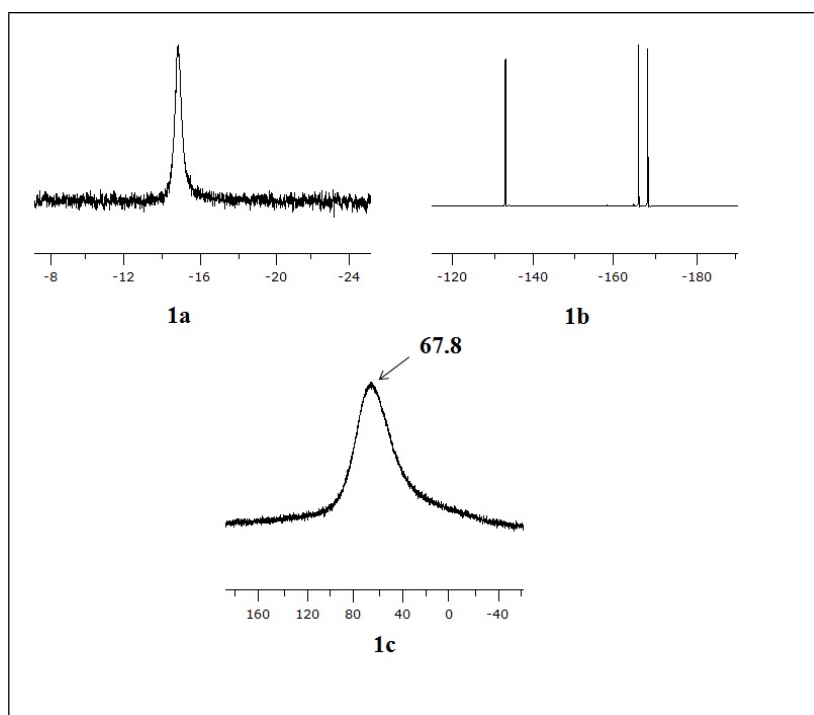

**Fig. S19**  $^{11}\text{B}$  (128 MHz,  $\text{THF-}d_8$ ,  $-35\text{ }^\circ\text{C}$ ),  $^{19}\text{F}$  (376 MHz,  $\text{THF-}d_8$ ,  $-35\text{ }^\circ\text{C}$ ), and  $^{27}\text{Al}$  NMR (104 MHz,  $\text{THF-}d_8$ ,  $-35\text{ }^\circ\text{C}$ ) spectrum of  $[\{(2,6\text{-}i\text{Pr}_2\text{C}_6\text{H}_3\text{N})\text{P}(\text{Ph}_2)(\text{N}t\text{Bu})\}\text{AlMe}]^+ [\text{MeB}(\text{C}_6\text{F}_5)_3]^-$  (**7**) is shown in figure **1a**, **1b** and **1c**, respectively.

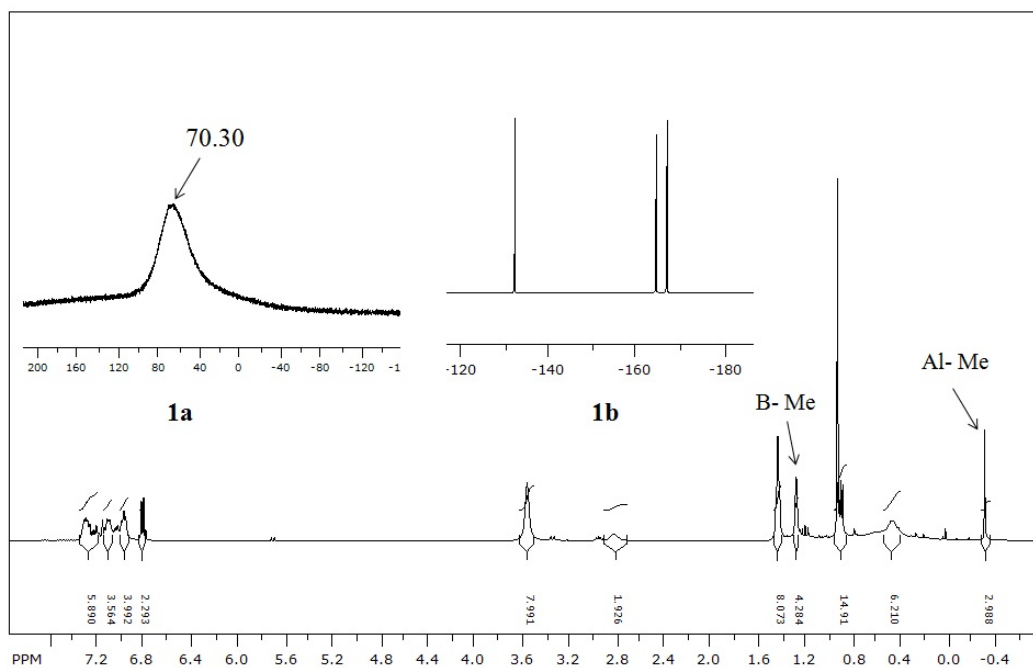

**Fig. S20** This sample was prepared in THF at room temperature and NMR recorded in  $\text{C}_6\text{D}_6$  at room temperature.  $^1\text{H}$  NMR (400 MHz,  $\text{C}_6\text{D}_6$ ) spectrum of  $[\{(2,6\text{-}i\text{Pr}_2\text{C}_6\text{H}_3\text{N})\text{P}(\text{Ph}_2)(\text{N}t\text{Bu})\}\text{AlMe}]^+ [\text{MeB}(\text{C}_6\text{F}_5)_3]^-$  (**7**). Inset **1a** shows  $^{27}\text{Al}$  NMR (104 MHz,  $\text{C}_6\text{D}_6$ ) and **1b** shows the  $^{19}\text{F}$  NMR (376 MHz,  $\text{C}_6\text{D}_6$ ) spectrum.

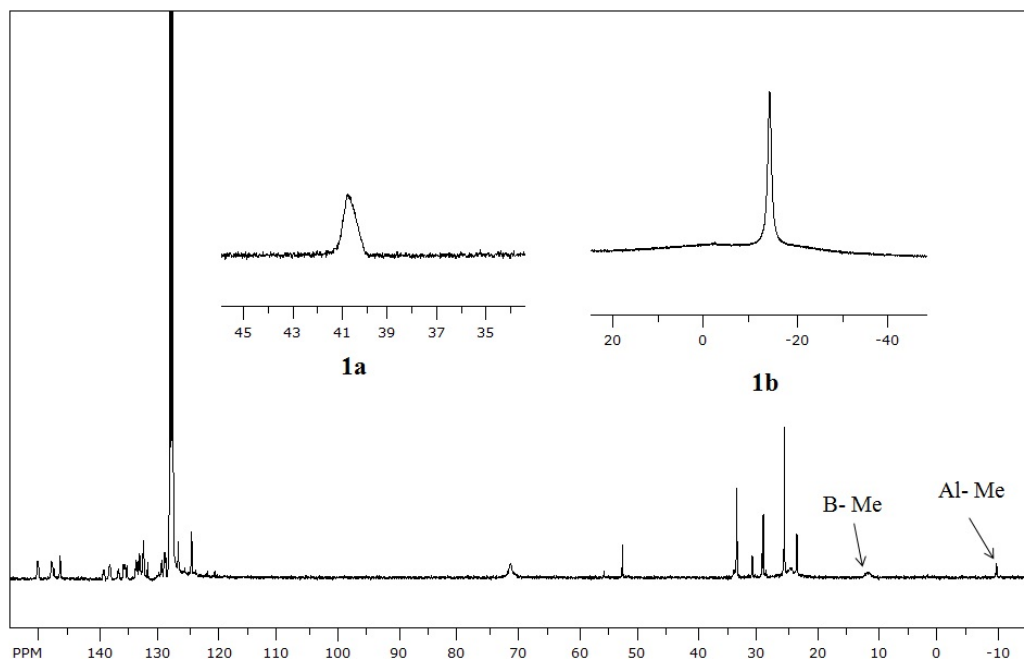

**Fig. S21** This sample was prepared in THF at room temperature and NMR recorded in  $\text{C}_6\text{D}_6$  at room temperature.  $^{13}\text{C}$  NMR (100 MHz,  $\text{C}_6\text{D}_6$ ) spectrum of  $[(2,6\text{-}i\text{Pr}_2\text{C}_6\text{H}_3\text{N})\text{P}(\text{Ph}_2)(\text{N}t\text{Bu})]\text{AlMe}^+[\text{MeB}(\text{C}_6\text{F}_5)_3]^-$  (**7**). Inset **1a** shows  $^{31}\text{P}\{^1\text{H}\}$  (162 MHz,  $\text{C}_6\text{D}_6$ ) NMR and **1b** shows the  $^{11}\text{B}$  (128 MHz,  $\text{C}_6\text{D}_6$ ) NMR spectrum.

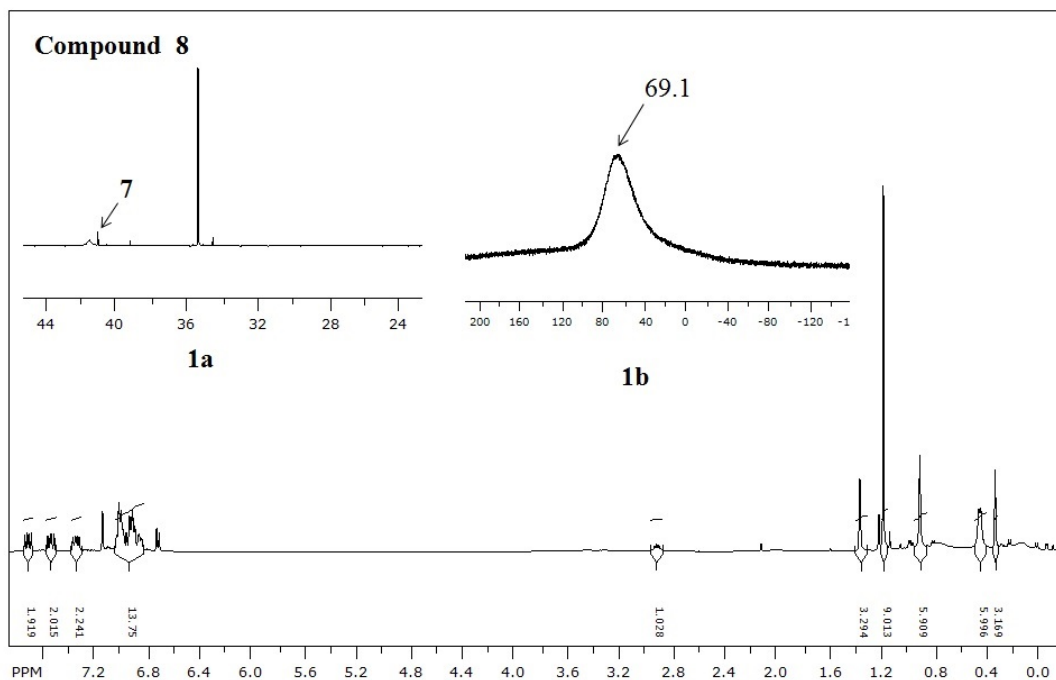

**Fig. S22** Room temperature *in-situ*  $^1\text{H}$  NMR (400 MHz,  $\text{C}_6\text{D}_6$ ) spectrum of  $[(2,6\text{-}i\text{Pr}_2\text{C}_6\text{H}_3\text{N})\text{P}(\text{Ph}_2)(\text{N}t\text{Bu})]\text{AlMe}(\text{C}_6\text{F}_5)$  (**8**) recorded after 2 days of sample preparation. Inset **1a** shows the  $^{31}\text{P}\{^1\text{H}\}$  (162 MHz,  $\text{C}_6\text{D}_6$ ) spectrum and the  $^{27}\text{Al}$  NMR (104 MHz,  $\text{C}_6\text{D}_6$ ) spectrum is shown in inset **1b**.

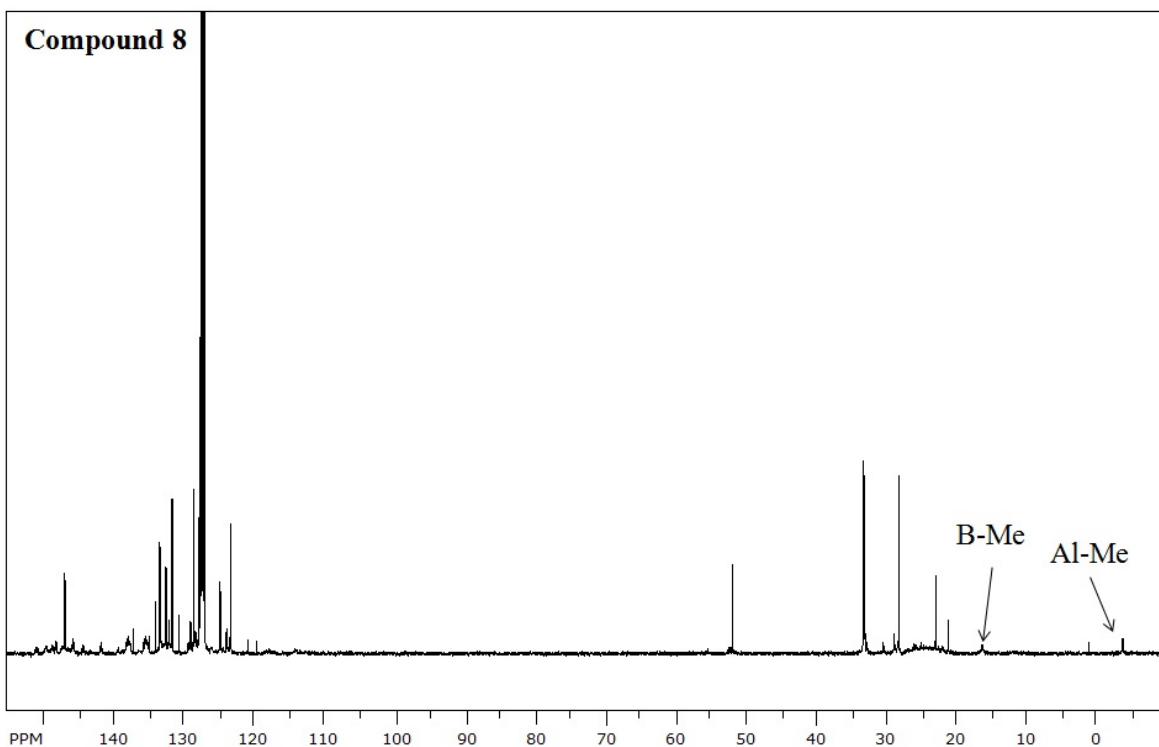

**Fig. S23** Room temperature *in-situ*  $^{13}\text{C}$  NMR (100 MHz,  $\text{C}_6\text{D}_6$ ) spectrum of  $[(2,6\text{-}i\text{Pr}_2\text{C}_6\text{H}_3\text{N})\text{P}(\text{Ph}_2)(\text{N}t\text{Bu})]\text{AlMe}(\text{C}_6\text{F}_5)$  (**8**) recorded after 2 days of sample preparation.

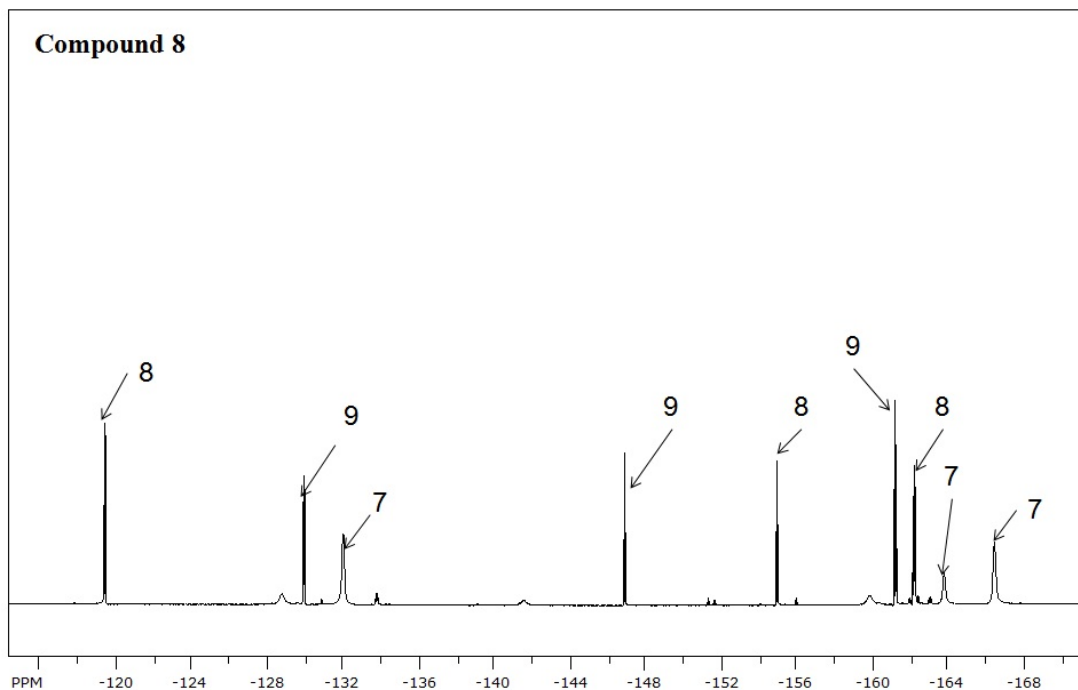

**Fig. S24** Room temperature *in-situ*  $^{19}\text{F}$  NMR (376 MHz,  $\text{C}_6\text{D}_6$ ) spectrum of  $[(2,6\text{-}i\text{Pr}_2\text{C}_6\text{H}_3\text{N})\text{P}(\text{Ph}_2)(\text{N}t\text{Bu})]\text{AlMe}(\text{C}_6\text{F}_5)$  (**8**) recorded after 2 days of sample preparation. Compound **9** is  $\text{MeB}(\text{C}_6\text{F}_5)_2$ .

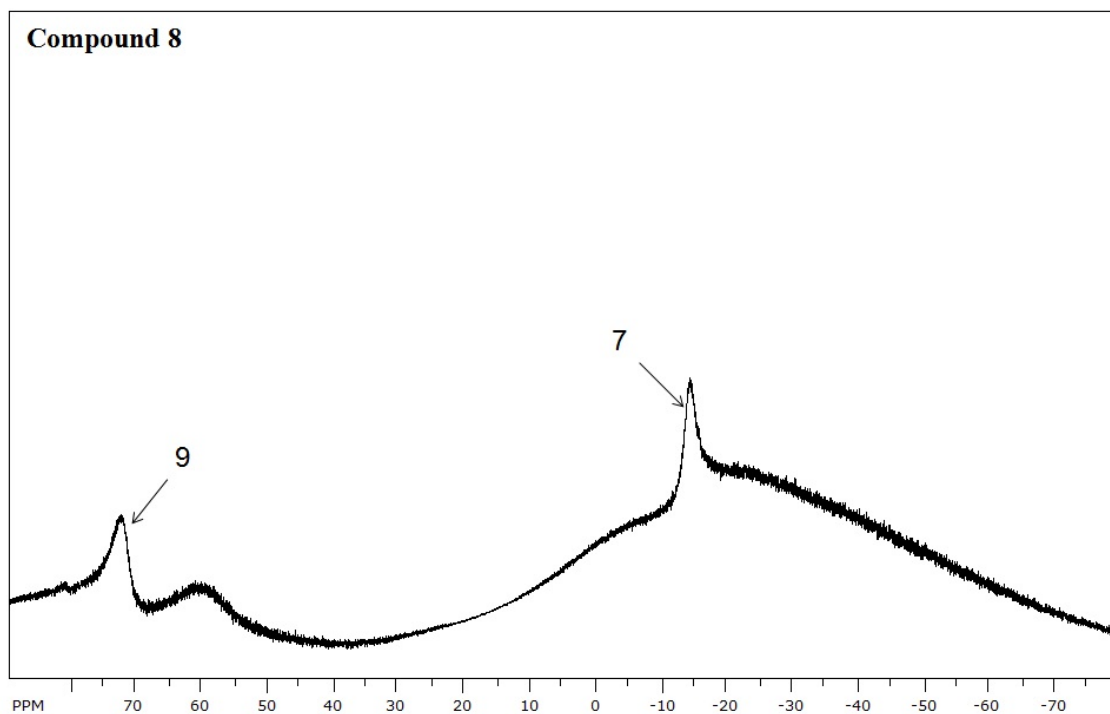

**Fig. S25** Room temperature *in-situ*  $^{11}\text{B}$  NMR (128 MHz,  $\text{C}_6\text{D}_6$ ) spectrum of  $[(2,6\text{-}i\text{Pr}_2\text{C}_6\text{H}_3\text{N})\text{P}(\text{Ph}_2)(\text{N}t\text{Bu})]\text{AlMe}(\text{C}_6\text{F}_5)$  (**8**) recorded after 2 days of sample preparation. Compound **9** is  $\text{MeB}(\text{C}_6\text{F}_5)_2$ .
